# Supplementary material for: Role of KRAS in regulating normal human airway basal cell differentiation
Source: PubMed Central journal article supplement (PMC6688249; doi:10.1186/s12931-019-1129-4), 2019-08-09

## Supplemental Methods

### Inclusion and Exclusion Criteria

#### Healthy controls: Inclusion criteria

- Males and females, at least 18 years old
- Provide informed consent
- Good health without history of chronic lung disease, including asthma, and without recurrent or recent (within 3 months) acute pulmonary disease
- Normal physical examination
- HIV negative
- Normal  $\alpha$ 1-antitrypsin level
- Not pregnant (females)
- Never-smokers by history, with current smoking status validated by the following metabolites findings: urine nicotine  $<2$  ng/ml and urine cotinine  $<5$  ng/ml
- Normal routine laboratory evaluation, including general hematologic studies, general serologic/immunologic studies, general biochemical analyses and urine analysis
- Forced expiratory volume in 1 second (FEV1)  $\geq 80\%$  predicted, forced vital capacity (FVC)  $\geq 80\%$  predicted, FEV1/FVC ( $\geq 0.7$ ) based on pre-bronchodilator spirometry and total lung capacity (TLC)  $\geq 90\%$  predicted
- Normal posterior-anterior (PA) and lateral chest radiograph
- Normal electrocardiogram
- No history of allergies to medications used during bronchoscopy
- Not taking any medications relevant to lung disease or known to effect the airway epithelium
- Willingness to participate in the study

#### Smokers: Inclusion criteria

- Males and females, at least 18 years old
- Provide informed consent
- Normal physical examination
- HIV negative
- Normal  $\alpha$ 1-antitrypsin level
- Not pregnant (females)
- Self-reported current daily smokers with any number of pack-years, validated by urine nicotine  $\geq 30$  ng/ml or cotinine  $\geq 50$  ng/ml
- Forced expiratory volume in 1 second (FEV1)  $\geq 80\%$  predicted, forced vital capacity (FVC)  $\geq 80\%$  predicted, FEV1/FVC ( $\geq 0.7$ ) based on pre-bronchodilator spirometry and total lung capacity (TLC)  $\geq 80\%$  predicted
- Normal PA and lateral chest radiograph
- Normal electrocardiogram
- Good health without history of chronic lung disease, and without recurrent or recent (within 3 months) acute pulmonary disease
- No history of allergies to medications used during bronchoscopy
- Normal routine laboratory evaluation, including general hematologic studies, general serologic/immunologic studies, general biochemical analyses, and urine analysis
- Willingness to participate in the study

**All subjects: Exclusion criteria**

- Unable to meet the inclusion criteria
- Individuals in whom participation in the study would compromise the normal care and expected progression of their disease
- Current active infection or acute illness of any kind
- Evidence of malignancy within the past 5 years other than localized skin malignancy
- Current alcohol or drug abuse
- Any evidence of interstitial lung disease, pulmonary hypertension, diastolic dysfunction or other disorders associated with a low DLCO

### Supplemental Figure Legend

**Supplemental Figure 1.** Effect of constitutive KRAS activity on expression of SOX family transcription factors and NOTCH pathway genes. Primary human airway BC were infected with control lentivirus or lentivirus over-expressing wild-type (WT) KRAS or the constitutively active G12V mutant (activated) and cultured on ALI for 14 days **A.** qPCR analysis to assess mRNA expression of SOX2 and SOX9. **B.** qPCR analysis to assess mRNA expression of the NOTCH pathway genes NOTCH1, NOTCH2, NOTCH3, HES1 and HEY1. For **A** and **B** bars indicate the normalized mRNA expression. Error bars indicate standard error. Data from n=3 independent experiments, each performed in triplicate with independent donors of BC.

## A. mRNA expression of SOX transcription factors

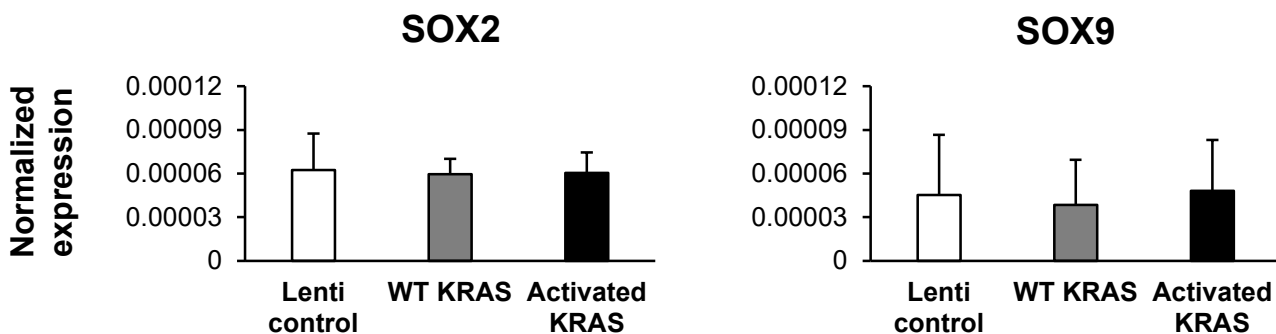

## B. mRNA expression of NOTCH pathway genes

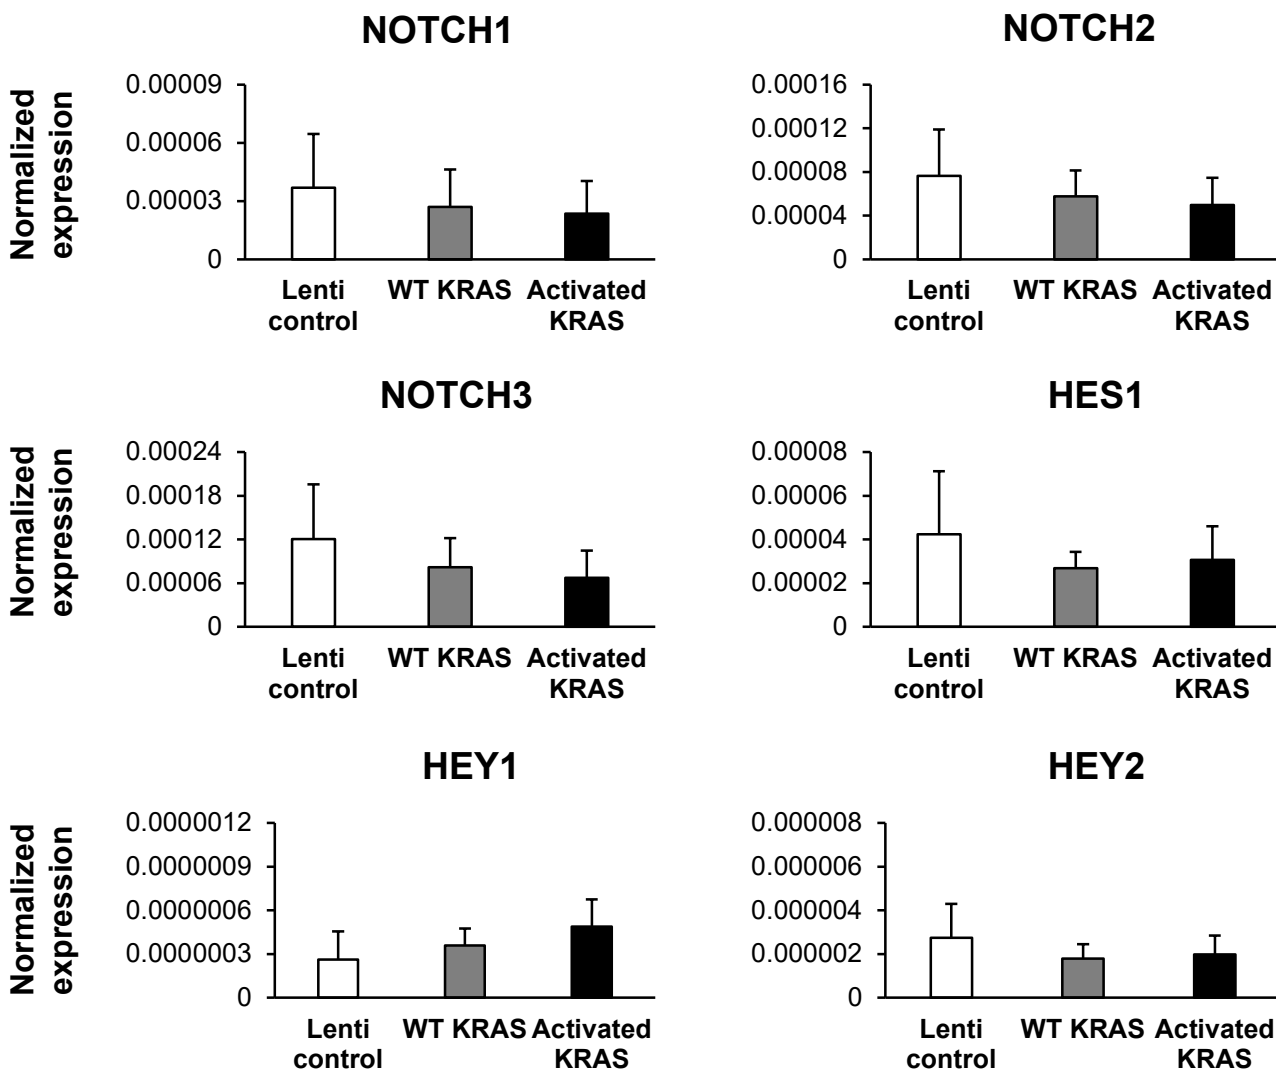

Supplement: 12931_2019_1129_MOESM1_ESM.pdf [file 12931_2019_1129_MOESM1_ESM.pdf]
